# Supplementary material for: Prediction of refractive error and its progression: a machine learning-based algorithm
Source: PubMed Central journal article supplement — BMJ Open Ophthalmol. 2023 Oct 3;8(1):e001298. doi: 10.1136/bmjophth-2023-001298 (PMC10551949; doi:10.1136/bmjophth-2023-001298), 2023-10-03
Supplement: bmjophth-2023-001298supp001.pdf [file bmjophth-2023-001298supp001.pdf]

## Supplementary material

S1

Cross-Sectional data, output axial length to corneal radius ratio

| Action | TermName   | DF | delDF | FStat    | pValue      |
|--------|------------|----|-------|----------|-------------|
| Start  | 1          | 1  |       |          |             |
| Add    | Age        | 2  | 1     | 5246,91  | 0           |
| Add    | Rx         | 3  | 1     | 28588,76 | 0           |
| Add    | Lthk       | 4  | 1     | 2680,11  | 0           |
| Add    | AcD        | 5  | 1     | 2280,27  | 0           |
| Add    | Rx:AcD     | 6  | 1     | 200,93   | 2,85742E-45 |
| Add    | Gender     | 7  | 1     | 98,60    | 3,74447E-23 |
| Add    | Lthk:AcD   | 8  | 1     | 50,96    | 9,90802E-13 |
| Add    | Rx:Lthk    | 9  | 1     | 17,37    | 3,0941E-05  |
| Add    | Gender:AcD | 10 | 1     | 13,61    | 0,000225613 |
| Add    | Gender:Rx  | 11 | 1     | 21,22    | 4,12853E-06 |
| Add    | Age:AcD    | 12 | 1     | 5,29     | 0,02136419  |
| Add    | Age:Lthk   | 13 | 1     | 7,60     | 0,005835529 |

Cross-Sectional data Output Sphere (D)

| Action | TermName     | DF | delDF | FStat    | pValue    |
|--------|--------------|----|-------|----------|-----------|
| Start  | 1            | 1  |       |          |           |
| Add    | Age          | 2  | 1     | 4369,53  | 0         |
| Add    | AxICr        | 3  | 1     | 28588,75 | 0         |
| Add    | AcD          | 4  | 1     | 544,42   | 5,57E-118 |
| Add    | Lthk         | 5  | 1     | 327,29   | 2,90E-72  |
| Add    | Gender       | 6  | 1     | 172,18   | 4,39E-39  |
| Add    | Lthk:AcD     | 7  | 1     | 111,04   | 7,37E-26  |
| Add    | Age:AxICr    | 8  | 1     | 39,82    | 2,89E-10  |
| Add    | Age:AcD      | 9  | 1     | 42,07    | 9,12E-11  |
| Add    | Age:Lthk     | 10 | 1     | 11,32    | 7,68E-4   |
| Add    | Age:Gender   | 11 | 1     | 6,32     | 1,19E-2   |
| Add    | AxICr:AcD    | 12 | 1     | 5,48     | 1,93E-2   |
| Add    | Gender:AcD   | 13 | 1     | 3,96     | 4,67E-2   |
| Add    | Gender:AxICr | 14 | 1     | 4,69     | 3,03E-2   |

Longitudinal data Output AxL/Cr

| Action | TermName | DF | delDF | FStat       | pValue   |
|--------|----------|----|-------|-------------|----------|
| Start  | 1        | 1  |       |             |          |
| Add    | iSph     | 2  | 1     | 238,5641905 | 3,95E-37 |
| Add    | iAxL_Cr  | 3  | 2     | 13,46845481 | 3,01E-06 |
| Add    | iAcD     | 4  | 50    | 3,267640213 | 5,39E-09 |

## Longitudinal data Output Sphere

| Action | TermName | DF | deIDF | FStat  | pValue   |
|--------|----------|----|-------|--------|----------|
| Start  | 1        | 1  |       |        |          |
| Add    | iSph     | 2  | 1     | 593,09 | 7,06E-65 |
| Add    | iLth     | 3  | 51    | 2,04   | 3,54E-4  |
| Add    | iAxL_Cr  | 4  | 1     | 4,17   | 4,25E-2  |

## S2: Hyperparameters optimization values

| Model given number | Model              | Optimization*                                                     |
|--------------------|--------------------|-------------------------------------------------------------------|
| 1                  | GPR-Sq-exponential | Kernel Scale: 0.058<br>Sigma: 1.32<br>Standardized: true          |
| 2                  | GPR-Matern         | Kernel Scale: 0.022<br>Sigma: 17.96<br>Standardized: false        |
| 3                  | SVR- Linear        | Box constraint: 0.0057<br>Epsilon: 0.00012<br>Standardized: false |
| 4                  | SVM - Quadratic    | Box constraint: 0.62<br>Epsilon: 0.0015<br>Standardized: true     |
| 5                  | SVR- Linear        | Box constraint: 0.16<br>Epsilon: 0.58<br>Standardized: false      |

\*Bayesian optimization with 30 iterations. Training time limit: false
